# Supplementary material for: Seroepidemiology of Toxocariasis and Its Clinical Implications in Gwangju and Jeonnam-province, Korea
Source: PubMed Central journal article supplement — Ann Lab Med. 2015 May 21;35(4):449–53. doi: 10.3343/alm.2015.35.4.449 (PMC4446585; doi:10.3343/alm.2015.35.4.449), 2015-05-21
Supplement: alm-35-449-s001.pdf [file alm-35-449-s001.pdf]

**Supplemental Data Table S1.** Literature review for the prevalence of toxocariasis in eosinophilic patients in Korea

| Region            | N of eosinophilic patients | Mean age | M/F    | % of male | % positivity | Tested Ab | Reference     |
|-------------------|----------------------------|----------|--------|-----------|--------------|-----------|---------------|
| Chungcheongnam-do | 101                        | 53.8     | 62/39  | 61.4      | 45.5         | IgG       | [2]           |
| Pohang            | 90                         | 54.8     | 69/21  | 76.7      | 62.1         | IgG       | [8]           |
| Seoul             | 103                        | 50.9     | 81/22  | 78.6      | 68.0         | IgG       | [13]          |
| Seoul             | 120                        | 53.4     | 97/23  | 80.8      | 86.7         | IgG       | [9]           |
| Suwon             | 21                         | 52.2     | 13/8   | 61.9      | 90.5         | IgE       | [15]          |
| Jeollanam-do      | 138                        | 62.1     | 100/38 | 72.5      | 76.1         | IgG       | in this study |

Abbreviations: M, male; F, female; Ab, antibody.
