# Supplementary material for: Seroepidemiology of Toxocariasis and Its Clinical Implications in Gwangju and Jeonnam-province, Korea
Source: PubMed Central journal article supplement — Ann Lab Med. 2015 May 21;35(4):449–53. doi: 10.3343/alm.2015.35.4.449 (PMC4446585; doi:10.3343/alm.2015.35.4.449), 2015-05-21
Supplement: alm-35-449-s002.pdf [file alm-35-449-s002.pdf]

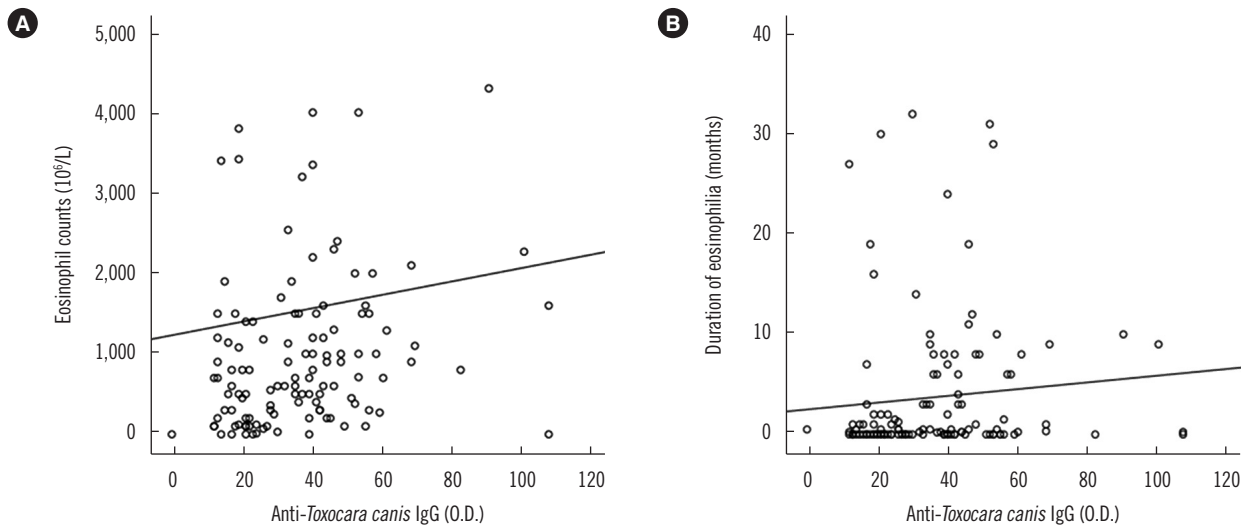

**Supplemental Data Figure S1.** Correlations between the result of anti-*Toxocara canis* IgG ELISA and the eosinophil counts or duration of eosinophilia. The positive correlations were observed between the optical density levels of IgG anti-*Toxocara canis* antibody analyzed by ELISA and eosinophil counts ( $r=0.234$ ,  $P<0.001$ ) (A) or the duration of eosinophilia ( $r=0.155$ ,  $P=0.019$ ) (B).
